# Supplementary material for: The celecoxib derivatives AR-12 and AR-14 induce autophagy and clear prion-infected cells from prions
Source: PubMed Central journal article supplement (PMC5730578; doi:10.1038/s41598-017-17770-8), 2017-12-14
Supplement: 41598_2017_17770_MOESM1_ESM.pdf [file 41598_2017_17770_MOESM1_ESM.pdf]

# The celecoxib derivatives AR-12 and AR-14 induce autophagy and clear prion-infected cells from prions.

Basant A. Abdulrahman, Dalia H. Abdelaziz, Simrika Thapa, Li Lu, Shubha Jain, Sabine Gilch, Stefan Proniuk, Alexander Zukiwski, and Hermann M. Schatzl

Supplementary Data

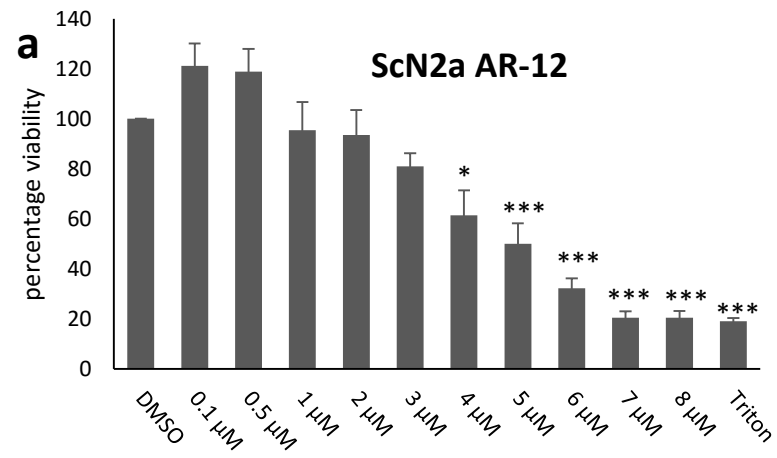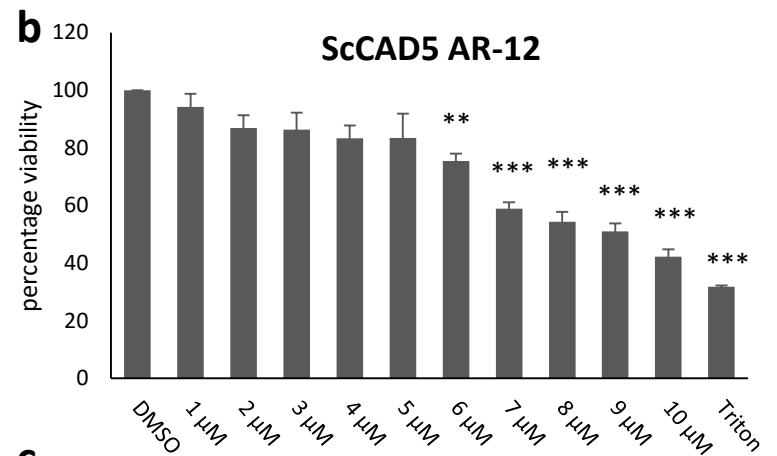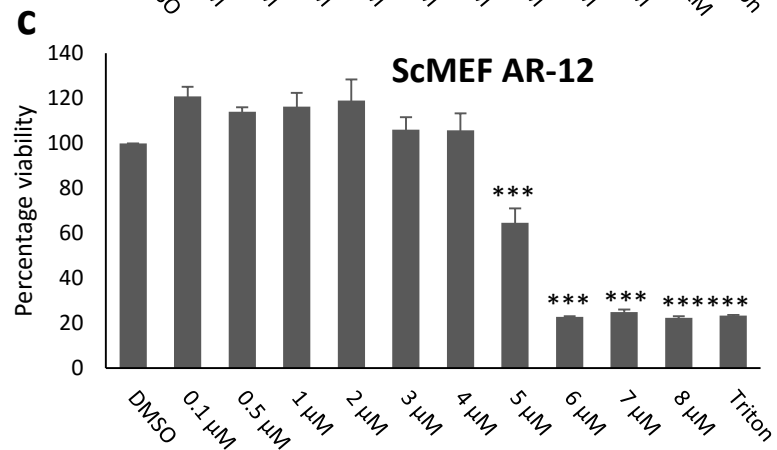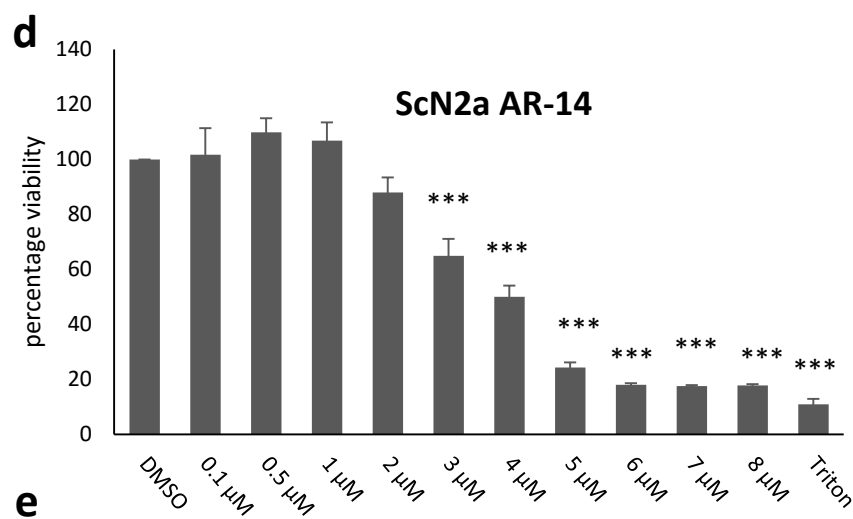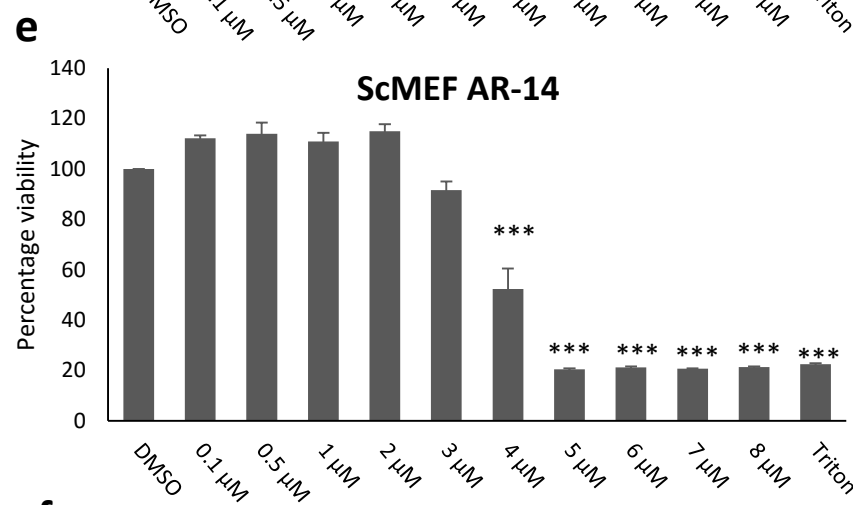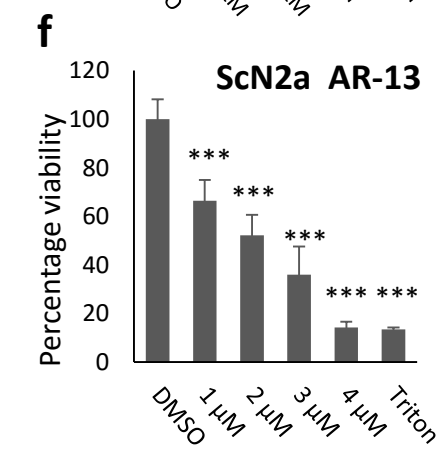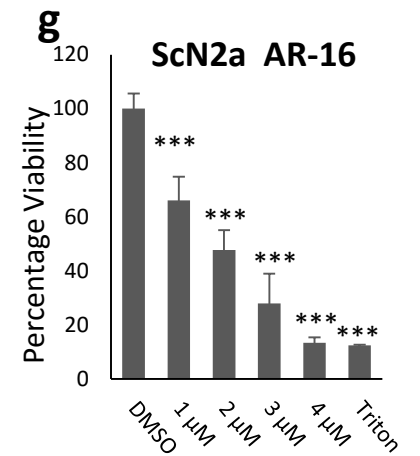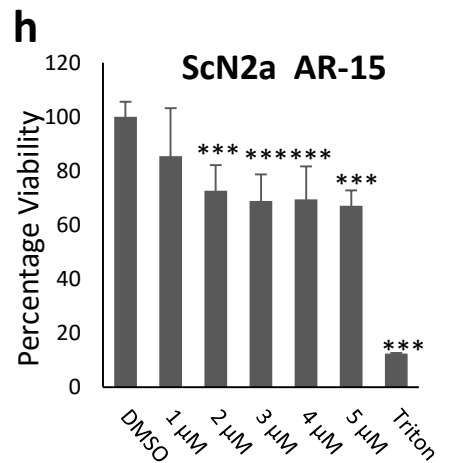

**Supplementary Fig. 1:** XTT viability assay for ScN2a (**a**, **d**, **f**, **g** and **h**), ScCAD (**b**) or ScMEF cells (**c**, **e**) treated with different concentrations of AR compounds. DMSO was used as vehicle control. (\* $p < 0.05$ ), (\*\*  $p < 0.01$ ), (\*\*\*)  $p < 0.001$ ) considered significant.

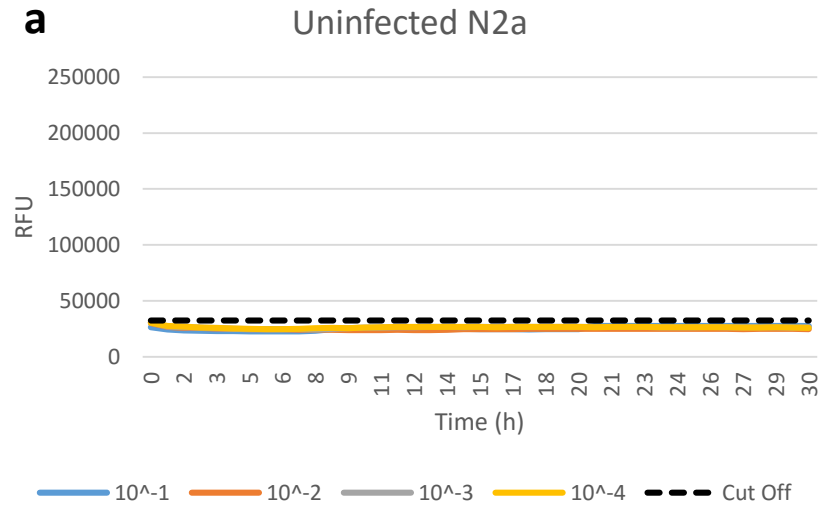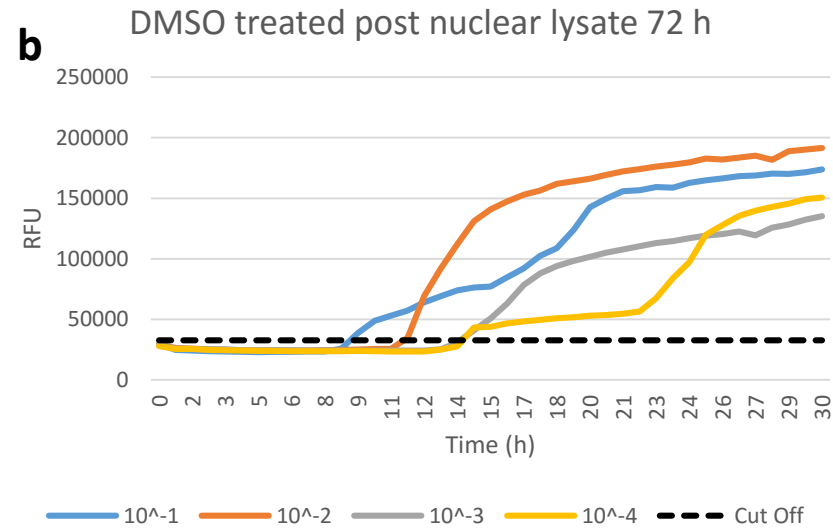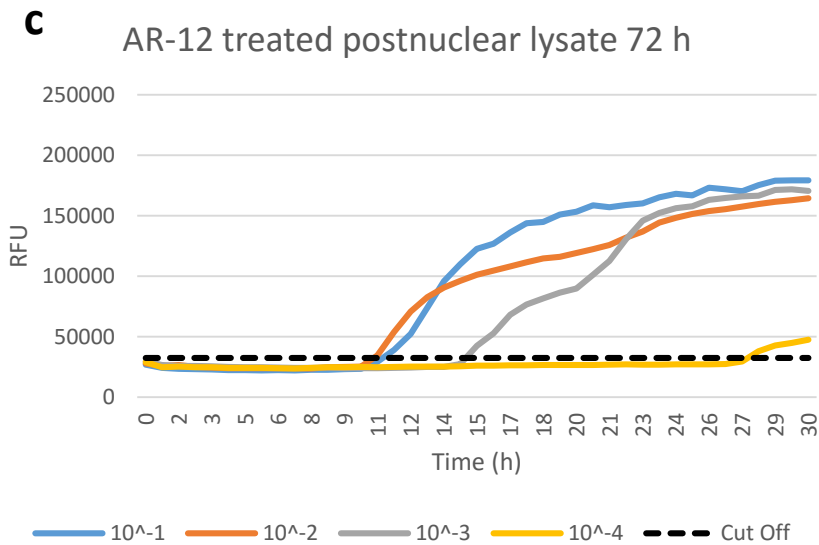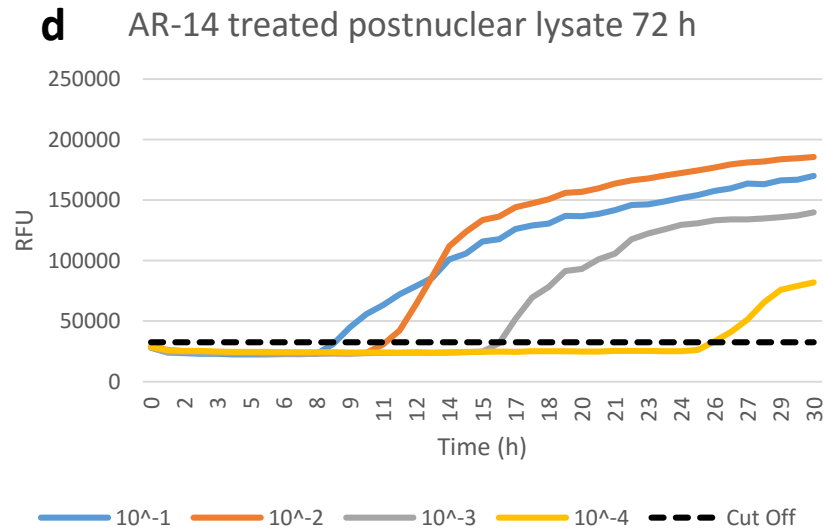

**Supplementary Fig. 2:**

RT-QuIC analysis of post-nuclear lysates of either uninfected N2a cells (**a**) or post-nuclear lysates of ScN2a cells treated after lysis with AR-12 (3  $\mu$ M) (**c**), AR-14 (2  $\mu$ ) (**d**) or DMSO (**b**) for 72 h. Each quadruplicate RT-QuIC reaction was seeded with 2  $\mu$ l of post-nuclear lysate (at dilutions  $10^{-1}$  to  $10^{-4}$ ). The average increase of Thioflavin-T fluorescence of replicate wells is plotted as a function of time. Y-axis represents relative fluorescent units (RFU) and x-axis time in hours (h).

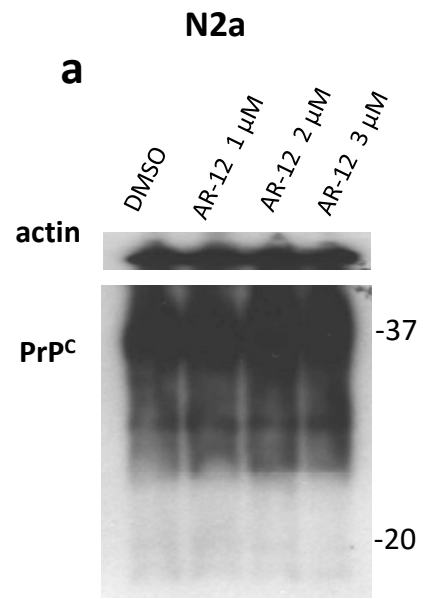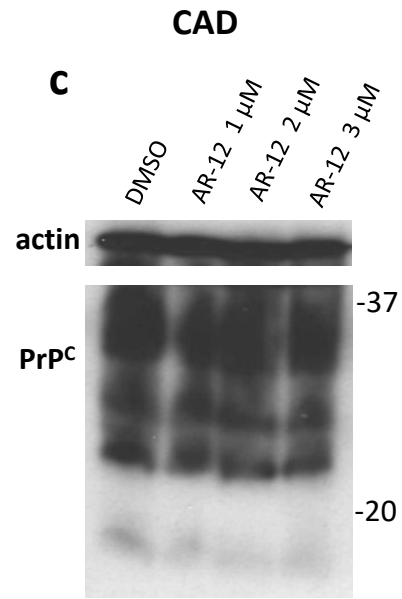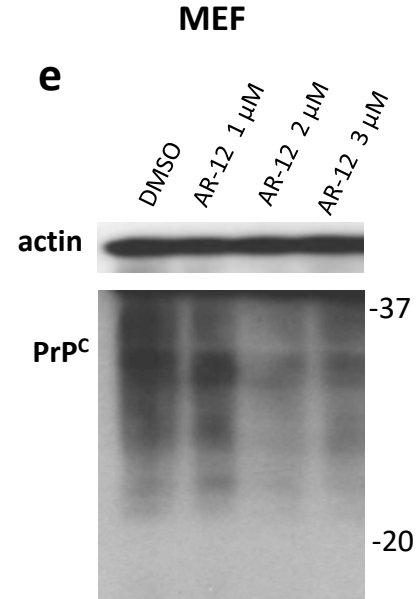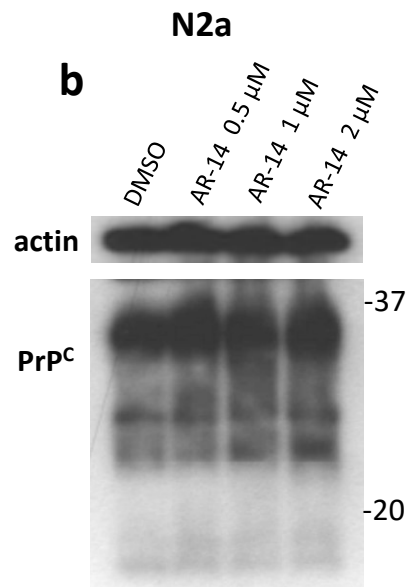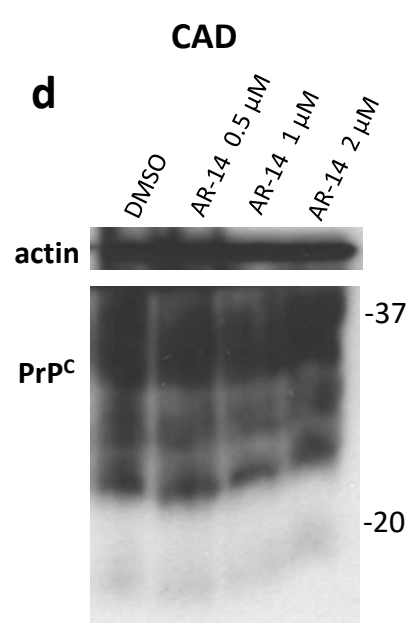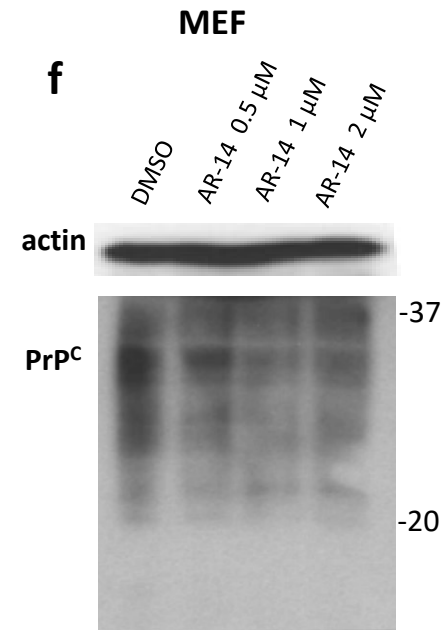

**Supplementary Figure 3:** Uninfected N2a (**a, b**), CAD (**c, d**) and MEF (**e, f**) cells were treated with AR-12, AR-14 or DMSO as a control for 72 h. Immunoblots were developed with anti-PrP mAb 4H11 and re-probed for actin.
